# Supplementary material for: A qualitative proteome-wide lysine crotonylation profiling of papaya (Carica papaya L.)
Source: PubMed Central journal article supplement (PMC5974297; doi:10.1038/s41598-018-26676-y), 2018-05-29
Supplement: 41598_2018_26676_MOESM1_ESM.pdf [file 41598_2018_26676_MOESM1_ESM.pdf]

# **A qualitative proteome-wide lysine crotonylation profiling of papaya (*Carica papaya* L.)**

Kaidong Liu<sup>1,3\*</sup>, Changchun Yuan<sup>1</sup>, Haili Li<sup>1</sup>, Kunyan Chen<sup>1</sup>, Lishi Lu<sup>1</sup>, Chenjia Shen<sup>4</sup>, Xiaolin Zheng<sup>2\*</sup>

<sup>1</sup> Life Science and Technology School, Lingnan Normal University, Zhanjiang, Guangdong 524048, China;

<sup>2</sup> College of Food Science and Biotechnology, Zhejiang Gongshang University, Hangzhou 310035, China;

<sup>3</sup> College of Bioscience and Technology, Hunan Agricultural University, Changsha, Hunan 410128, China;

<sup>4</sup> College of Life and Environmental Sciences, Hangzhou Normal University, Hangzhou, 310036, China.

\*Correspondence

Kaidong Liu

Email: liukaidong2001@126.com

Xiaolin Zheng

Email: zheng9393@163.com

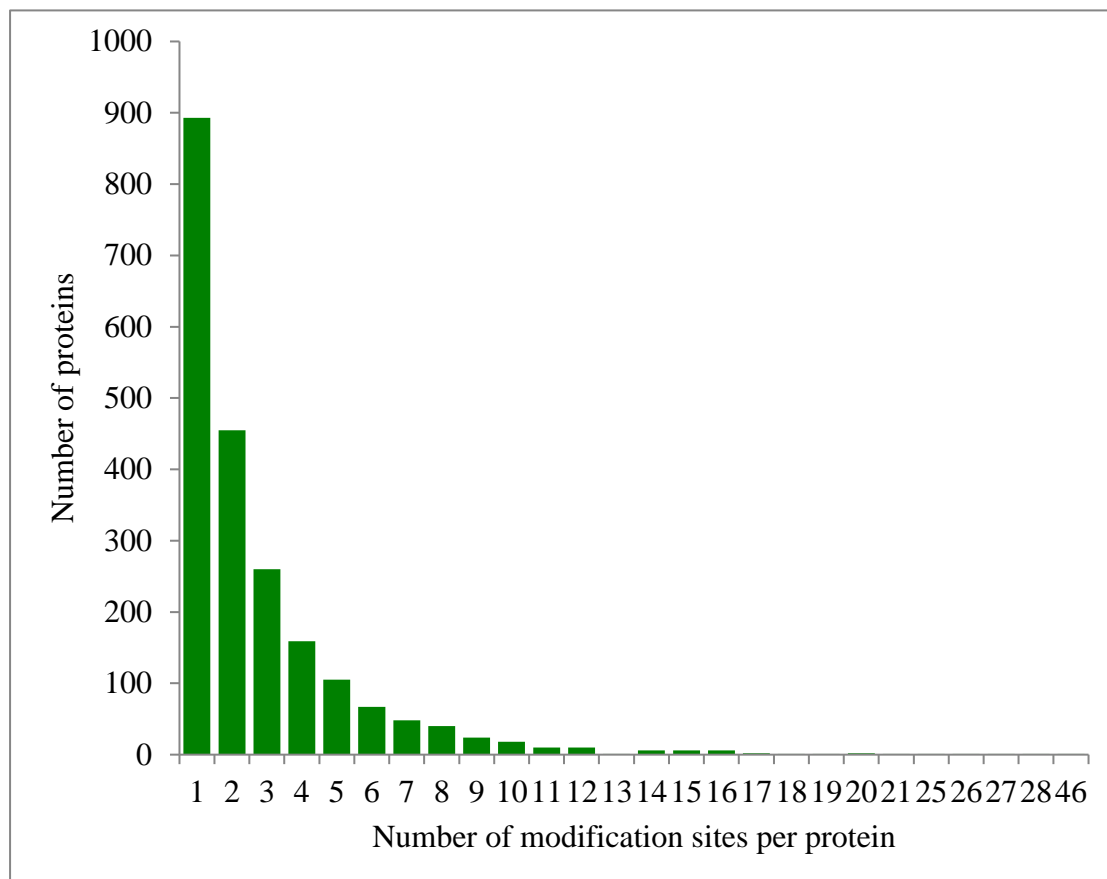

Figure S1 Number of crotonylation sites in each protein.

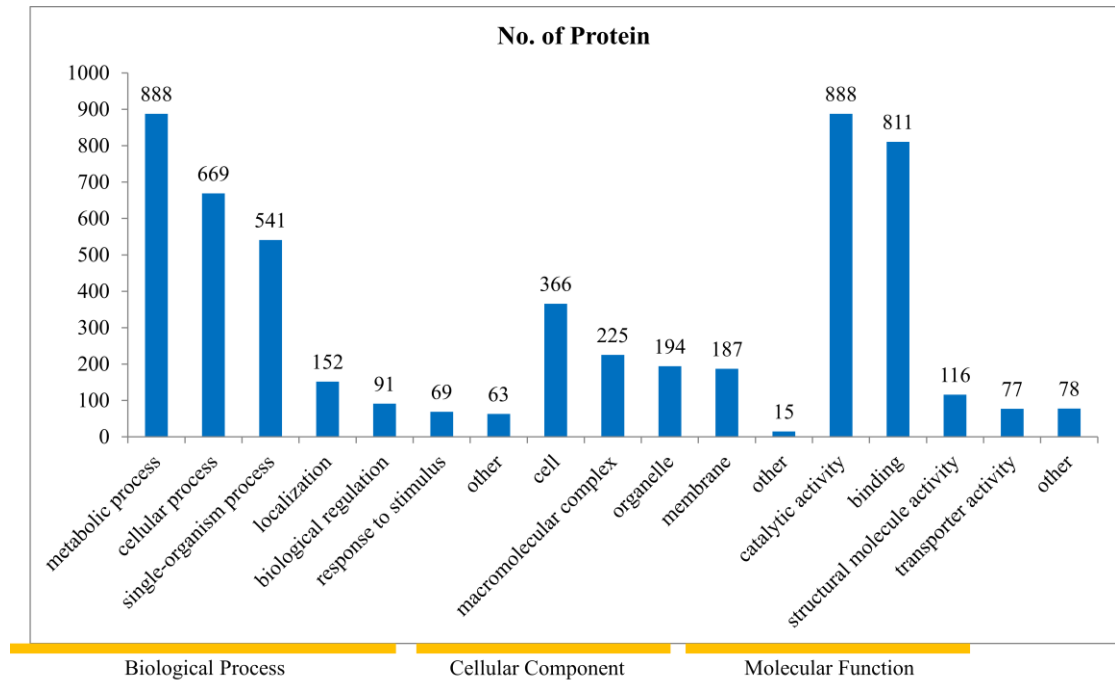

Figure S2 GO analysis of lysine crotonylated proteins in *C. papaya*.

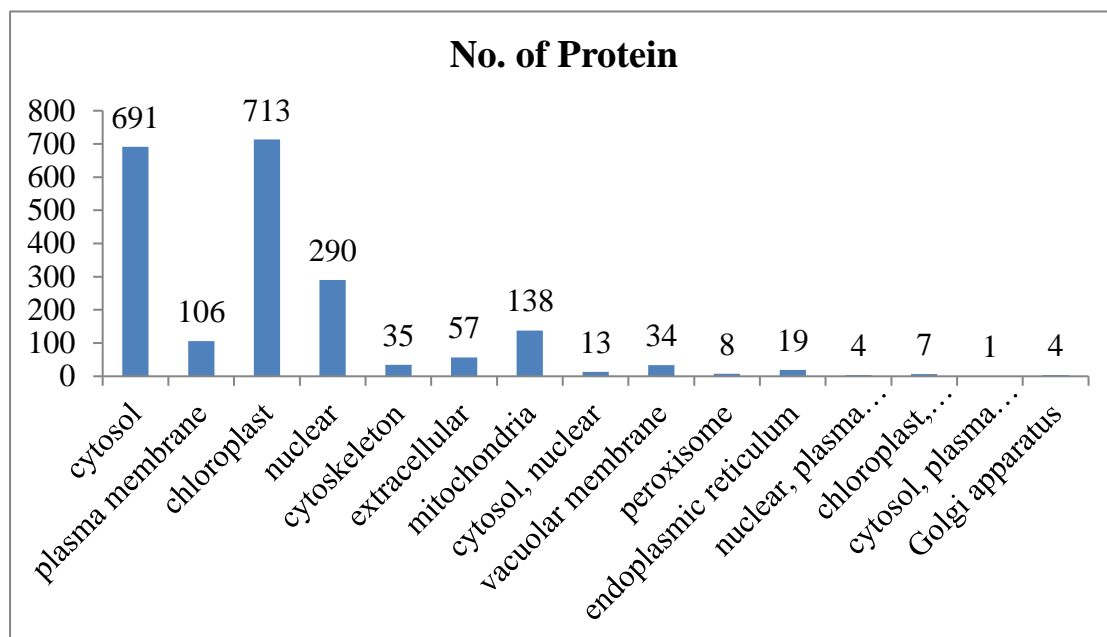

Figure S3 Subcellular localization analysis of lysine crotonylated proteins in *C. papaya*.

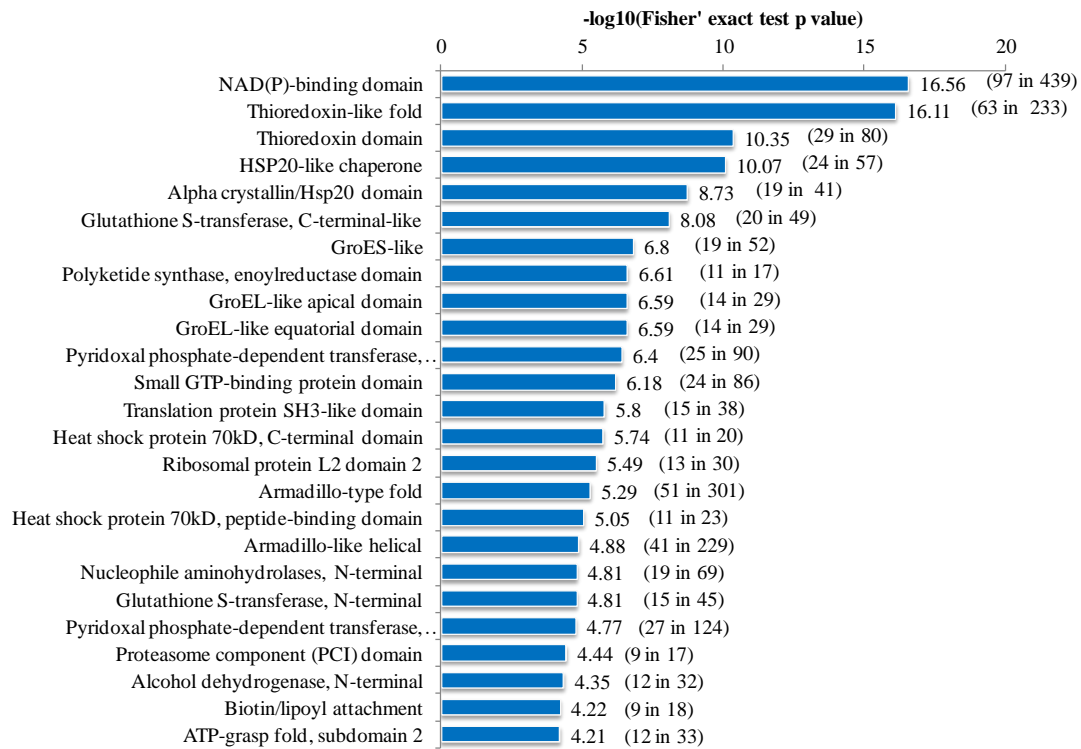

Figure S4 Domain enrichment analysis of all crotonylated proteins in *C. papaya*.
